# Supplementary material for: Assessment of novel vaccination regimens using viral vectored liver stage malaria vaccines encoding ME-TRAP
Source: PubMed Central journal article supplement (PMC5821890; doi:10.1038/s41598-018-21630-4), 2018-02-21

25 **Supplementary Tables**

26 **Table S1a. Individual adverse events graded as severe after vaccination with ChAd63 ME-**  
 27 **TRAP.**

| Volunteer | Duration (d) | Relatedness to vaccination | Adverse event         | Study Group | Vaccine Number |
|-----------|--------------|----------------------------|-----------------------|-------------|----------------|
| 10431111  | 0            | Probable                   | Shivering             | 5           | 1              |
| 10431119  | 2            | Definite                   | Vaccine Site Swelling | 5           | 1              |
| 2043 1182 | 8            | Possible                   | Headache              | 6           | 3              |
| 2043 1182 | 7            | Possible                   | Sore throat           | 6           | 3              |
| 10431124  | 0            | Possible                   | Nausea/Vomiting       | 6           | 1              |
| 10431124  | 0            | Possible                   | Malaise               | 6           | 1              |

28 **Table S1b. Individual adverse events graded as severe after vaccination with MVA ME-**  
 29 **TRAP.**

| Volunteer     | Duration (d) | Relatedness to vaccination | Adverse event         | Study Group | Vaccine Number |
|---------------|--------------|----------------------------|-----------------------|-------------|----------------|
| MVT-10431105  | 4            | Definite                   | Vaccine Site Pain     | 1           | 4              |
| MVT-10431113  | 4            | Definite                   | Vaccine Site Pain     | 3           | 3              |
| MVT-10431113  | 0            | Possible                   | Malaise               | 3           | 3              |
| MVT 2043 1176 | 5            | Definite                   | Vaccine Site Pain     | 4           | 2              |
| MVT-10431114  | 2            | Probable                   | Feverish              | 4           | 2              |
| MVT-10431122  | 1            | Probable                   | Arthralgia            | 4           | 4              |
| MVT-10431122  | 1            | Probable                   | Myalgia               | 4           | 4              |
| MVT-10431119  | 4            | Probable                   | Vaccine Site Erythema | 5           | 2              |
| MVT-10431119  | 2            | Probable                   | Vaccine Site Swelling | 5           | 2              |
| MVT 2043 1182 | 2            | Definite                   | Vaccine Site Swelling | 6           | 2              |
| MVT 2043 1182 | 3            | Definite                   | Vaccine Site Pain     | 6           | 2              |
| MVT 2043 1182 | 1            | Definite                   | Malaise               | 6           | 2              |
| MVT-10431135  | 0            | Probable                   | Feverish              | 6           | 2              |
| MVT-10431135  | 0            | Probable                   | Malaise               | 6           | 2              |
| MVT-10431135  | 0            | Probable                   | Fatigue               | 6           | 2              |
| MVT 2043 1173 | 7            | Definite                   | Vaccine Site Swelling | 7           | 2              |
| MVT-10431137  | 2            | Definite                   | Vaccine Site Pain     | 7           | 2              |
| MVT-10431137  | 2            | Probable                   | Feverish              | 7           | 2              |

30

31 **Table S2. Number of local and systemic adverse events reported in each group after each vaccination, stratified according to severity. N/V,**  
 32 **nausea and/or vomiting. N, number of volunteers at each vaccination.**

| Group | Vaccine | no. doses | n | Local Adverse Events |      |          |          |        |         |          |       | Systemic Adverse Events |          |            |         |         |         |          |     |       |            |
|-------|---------|-----------|---|----------------------|------|----------|----------|--------|---------|----------|-------|-------------------------|----------|------------|---------|---------|---------|----------|-----|-------|------------|
|       |         |           |   | Severity             | Pain | Swelling | Erythema | Warmth | Scaling | Pruritus | Other | Fever                   | Feverish | Arthralgia | Myalgia | Malaise | Fatigue | Headache | N/V | Other | Laboratory |
| 1     | ChAd63  | 3         | 6 | Mild                 | 10   | 4        | 9        | 6      | 0       | 2        | 0     | 1                       | 5        | 2          | 4       | 3       | 7       | 5        | 2   | 3     | 1          |
|       |         |           |   | Moderate             | 3    | 0        | 0        | 0      | 0       | 0        | 0     | 1                       | 2        | 1          | 0       | 0       | 2       | 7        | 0   | 1     | 0          |
|       |         |           |   | Severe               | 0    | 0        | 0        | 0      | 0       | 0        | 0     | 0                       | 0        | 0          | 0       | 0       | 0       | 0        | 0   | 0     | 0          |
|       | MVA     | 1         | 6 | Mild                 | 2    | 4        | 5        | 5      | 0       | 0        | 0     | 0                       | 2        | 3          | 2       | 4       | 5       | 3        | 1   | 0     | 0          |
|       |         |           |   | Moderate             | 3    | 1        | 0        | 0      | 0       | 0        | 0     | 1                       | 1        | 0          | 2       | 0       | 0       | 1        | 0   | 1     | 0          |
|       |         |           |   | Severe               | 1    | 0        | 0        | 0      | 0       | 0        | 0     | 0                       | 0        | 0          | 0       | 0       | 0       | 0        | 0   | 0     |            |
| 2     | ChAd63  | 2         | 6 | Mild                 | 4    | 3        | 5        | 1      | 0       | 1        | 0     | 5                       | 2        | 2          | 4       | 6       | 5       | 2        | 0   | 0     |            |
|       |         |           |   | Moderate             | 0    | 0        | 0        | 0      | 0       | 0        | 0     | 1                       | 0        | 1          | 1       | 1       | 0       | 1        | 1   | 0     |            |
|       |         |           |   | Severe               | 0    | 0        | 0        | 0      | 0       | 0        | 0     | 0                       | 0        | 0          | 0       | 0       | 0       | 0        | 0   | 0     |            |
|       | MVA     | 2         | 6 | Mild                 | 7    | 7        | 9        | 8      | 0       | 3        | 0     | 0                       | 1        | 3          | 4       | 6       | 3       | 4        | 1   | 3     |            |
|       |         |           |   | Moderate             | 4    | 1        | 1        | 1      | 0       | 0        | 0     | 0                       | 0        | 1          | 1       | 0       | 1       | 0        | 0   | 1     |            |
|       |         |           |   | Severe               | 0    | 0        | 0        | 0      | 0       | 0        | 0     | 0                       | 0        | 0          | 0       | 0       | 0       | 0        | 0   | 0     |            |
| 3     | ChAd63  | 2         | 6 | Mild                 | 7    | 3        | 7        | 7      | 0       | 1        | 0     | 0                       | 0        | 2          | 5       | 4       | 5       | 3        | 3   | 2     |            |
|       |         |           |   | Moderate             | 0    | 1        | 0        | 0      | 0       | 1        | 0     | 0                       | 1        | 0          | 0       | 0       | 1       | 3        | 0   | 1     |            |
|       |         |           |   | Severe               | 0    | 0        | 0        | 0      | 0       | 0        | 0     | 0                       | 0        | 0          | 0       | 0       | 0       | 0        | 0   | 0     |            |
|       | MVA     | 2         | 6 | Mild                 | 8    | 7        | 10       | 5      | 0       | 1        | 1     | 1                       | 2        | 0          | 7       | 3       | 8       | 5        | 4   | 3     |            |
|       |         |           |   | Moderate             | 3    | 1        | 0        | 1      | 0       | 0        | 0     | 0                       | 1        | 1          | 0       | 1       | 0       | 2        | 0   | 0     |            |
|       |         |           |   | Severe               | 1    | 0        | 0        | 0      | 0       | 0        | 0     | 0                       | 0        | 0          | 0       | 1       | 0       | 0        | 0   |       |            |
| 4     | ChAd63  | 1         | 6 | Mild                 | 5    | 0        | 4        | 4      | 1       | 1        | 0     | 2                       | 3        | 4          | 0       | 3       | 3       | 1        | 2   |       |            |
|       |         |           |   | Moderate             | 0    | 1        | 0        | 0      | 0       | 0        | 0     | 0                       | 0        | 0          | 0       | 0       | 0       | 0        | 0   |       |            |
|       |         |           |   | Severe               | 0    | 0        | 0        | 0      | 0       | 0        | 0     | 0                       | 0        | 0          | 0       | 0       | 0       | 0        | 0   |       |            |
|       | MVA     | 3         | 6 | Mild                 | 12   | 13       | 18       | 13     | 0       | 2        | 2     | 3                       | 7        | 6          | 7       | 5       | 10      | 3        | 1   | 1     |            |
|       |         |           |   | Moderate             | 5    | 2        | 0        | 0      | 0       | 0        | 0     | 0                       | 0        | 0          | 0       | 2       | 1       | 0        | 1   |       |            |
|       |         |           |   | Severe               | 1    | 0        | 0        | 0      | 0       | 0        | 0     | 0                       | 1        | 1          | 1       | 0       | 0       | 0        | 0   |       |            |
| 5     | ChAd63  | 2         | 6 | Mild                 | 6    | 1        | 4        | 3      | 0       | 2        | 1     | 2                       | 2        | 3          | 5       | 4       | 6       | 3        | 3   |       |            |
|       |         |           |   | Moderate             | 0    | 0        | 0        | 0      | 0       | 0        | 0     | 0                       | 0        | 0          | 0       | 1       | 0       | 0        | 1   |       |            |
|       |         |           |   | Severe               | 0    | 1        | 0        | 0      | 0       | 0        | 0     | 0                       | 0        | 0          | 0       | 0       | 0       | 0        | 1   |       |            |
|       | MVA     | 2         | 6 | Mild                 | 10   | 6        | 11       | 9      | 0       | 2        | 1     | 1                       | 2        | 0          | 2       | 4       | 8       | 4        | 3   |       |            |
|       |         |           |   | Moderate             | 2    | 1        | 1        | 0      | 0       | 0        | 0     | 0                       | 1        | 0          | 1       | 0       | 0       | 1        | 0   |       |            |
|       |         |           |   | Severe               | 0    | 1        | 0        | 0      | 0       | 0        | 0     | 0                       | 0        | 0          | 0       | 0       | 0       | 0        | 0   |       |            |
| 6     | ChAd63  | 2         | 6 | Mild                 | 7    | 2        | 9        | 4      | 0       | 0        | 1     | 1                       | 1        | 4          | 3       | 4       | 3       | 1        | 3   |       |            |
|       |         |           |   | Moderate             | 1    | 0        | 0        | 0      | 0       | 0        | 0     | 0                       | 1        | 0          | 1       | 0       | 0       | 2        | 0   |       |            |
|       |         |           |   | Severe               | 0    | 0        | 0        | 0      | 0       | 0        | 0     | 0                       | 0        | 0          | 0       | 1       | 0       | 1        | 1   |       |            |
|       | MVA     | 2         | 6 | Mild                 | 3    | 8        | 12       | 8      | 0       | 0        | 0     | 1                       | 1        | 3          | 1       | 3       | 2       | 0        | 3   |       |            |
|       |         |           |   | Moderate             | 8    | 3        | 0        | 0      | 0       | 0        | 0     | 0                       | 0        | 3          | 2       | 2       | 4       | 0        | 0   |       |            |
|       |         |           |   | Severe               | 1    | 1        | 0        | 0      | 0       | 0        | 0     | 0                       | 1        | 0          | 0       | 2       | 1       | 0        | 0   |       |            |
| 7     | ChAd63  | 2         | 6 | Mild                 | 7    | 4        | 8        | 0      | 0       | 0        | 0     | 3                       | 3        | 2          | 4       | 3       | 4       | 4        | 3   |       |            |
|       |         |           |   | Moderate             | 1    | 0        | 0        | 0      | 0       | 0        | 0     | 1                       | 1        | 1          | 1       | 1       | 2       | 0        | 2   |       |            |
|       |         |           |   | Severe               | 0    | 0        | 0        | 0      | 0       | 0        | 0     | 0                       | 0        | 0          | 0       | 0       | 0       | 0        | 0   |       |            |
|       | MVA     | 2         | 6 | Mild                 | 5    | 9        | 12       | 5      | 0       | 0        | 1     | 4                       | 2        | 2          | 4       | 1       | 5       | 4        | 3   |       |            |
|       |         |           |   | Moderate             | 6    | 1        | 0        | 0      | 0       | 0        | 0     | 0                       | 0        | 1          | 1       | 0       | 1       | 4        | 0   |       |            |
|       |         |           |   | Severe               | 1    | 1        | 0        | 0      | 0       | 0        | 0     | 0                       | 1        | 0          | 0       | 0       | 0       | 0        | 0   |       |            |

33

34 **Supplementary Figures**

35 **Figure S1. Sample gating strategy for multi-parameter flow cytometry with intracellular**  
 36 **cytokine staining.**

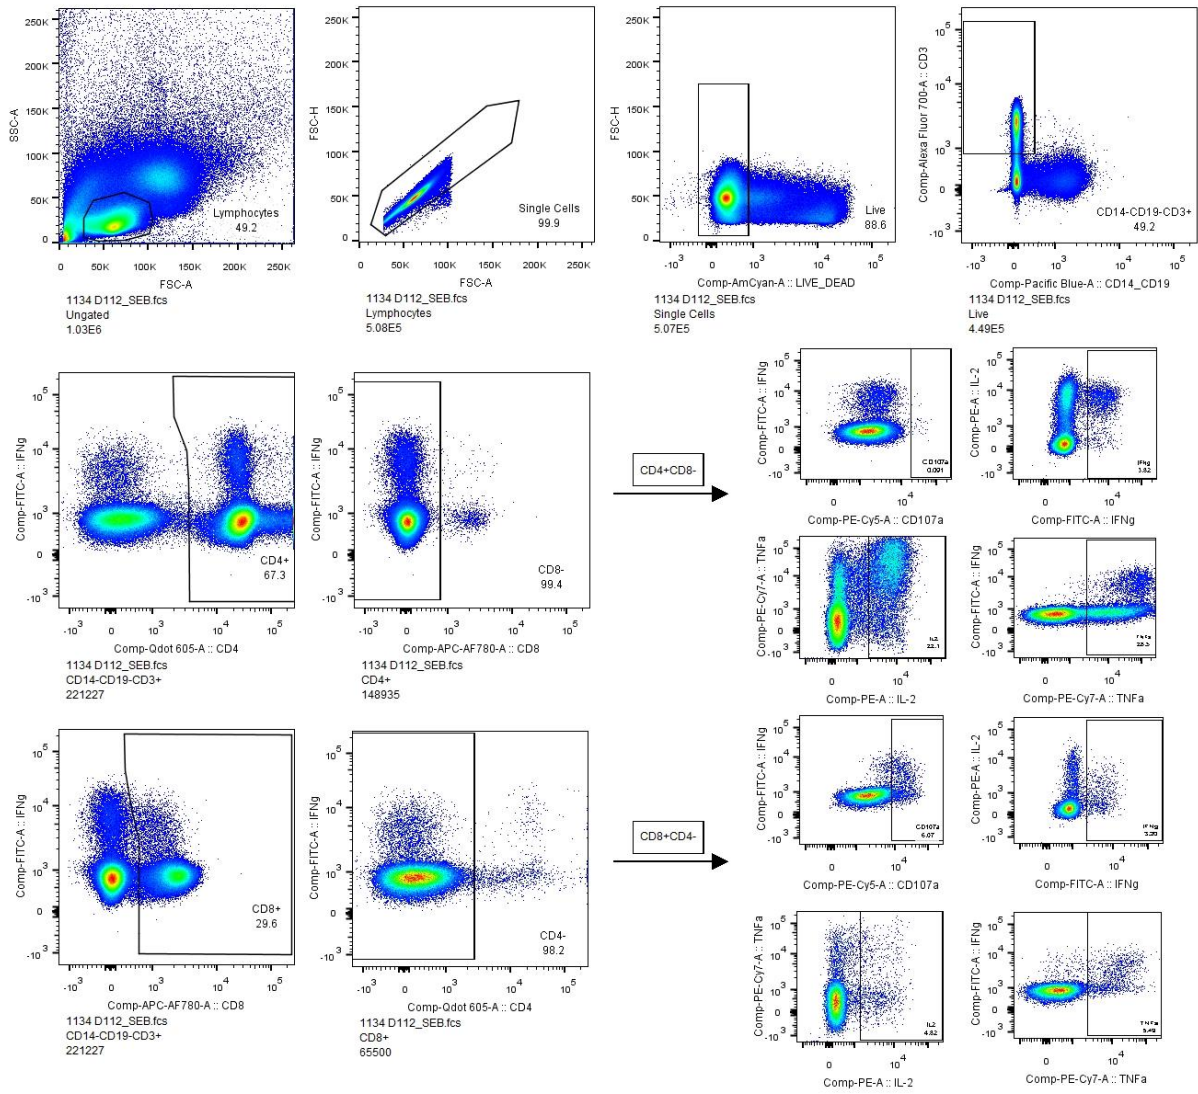

37 **Figure S2. CONSORT diagram displaying volunteer enrolment, exclusion, allocation and**  
 38 **follow up.**

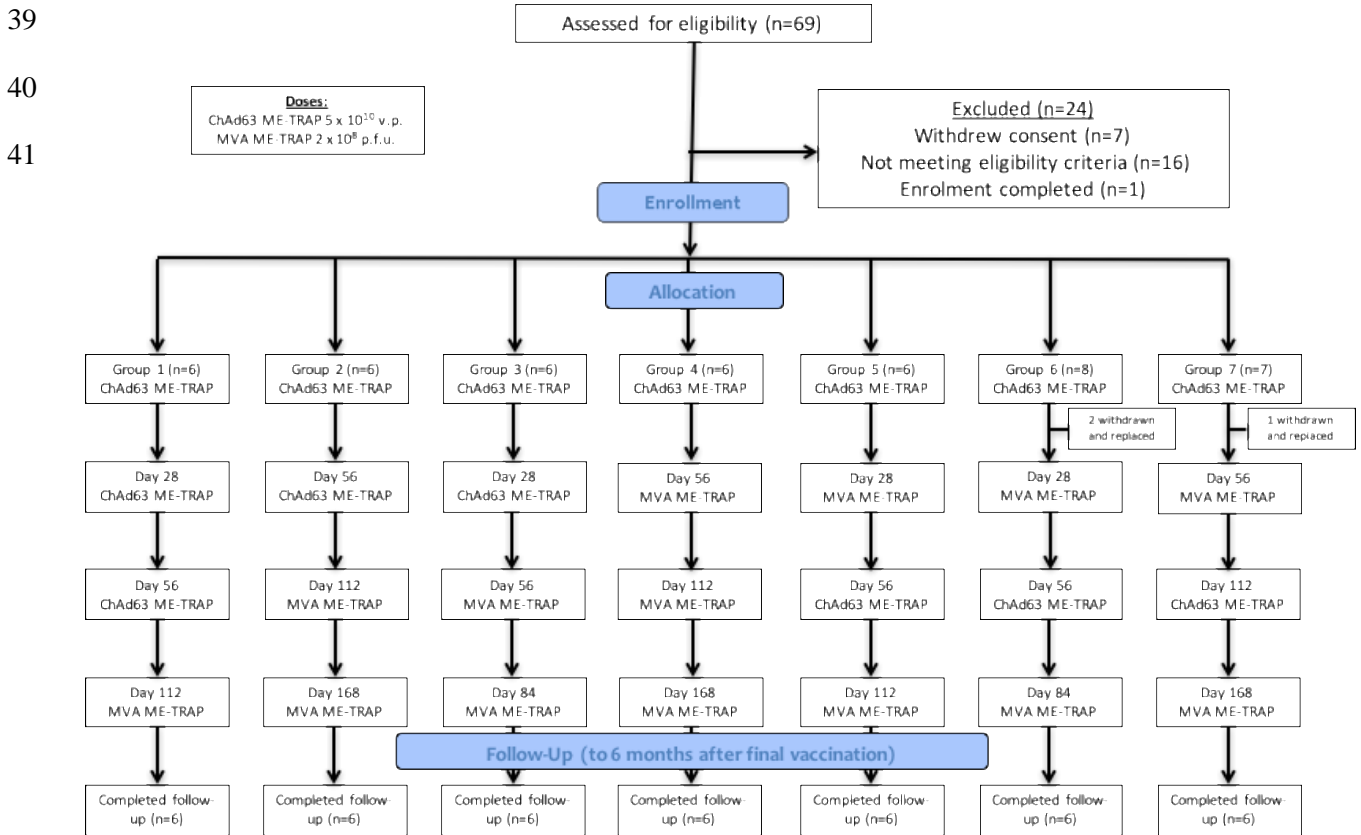

Supplement: 41598_2018_21630_MOESM1_ESM.pdf [file 41598_2018_21630_MOESM1_ESM.pdf]
